# Supplementary material for: Risk Factors for Childhood Stunting in 137 Developing Countries: A Comparative Risk Assessment Analysis at Global, Regional, and Country Levels
Source: PLoS Med. 2016 Nov 1;13(11):e1002164. doi: 10.1371/journal.pmed.1002164 (PMC5089547; doi:10.1371/journal.pmed.1002164)
Supplement: S1 Data — (XLSX) [file pmed.1002164.s001.xlsx]

## Sheet: Data availability
category	risk	source	citation	how obtain data?
Child nutrition and infection	Discontinued breastfeeding	http://www.biomedcentral.com/1741-7015/11/254 (Partially by personal communication because she provided us with estimates for all countries while the publication was for a limited set)	Roberts TJ, Carnahan E, Gakidou E. Can breastfeeding promote child health equity? A comprehensive analysis of breastfeeding patterns across the developing world and what we can learn from them. BMC Med. 2013;11:254.	download from original paper's online supplementary material
Child nutrition and infection	Childhood diarrhea	http://www.thelancet.com/journals/lancet/article/PIIS0140-6736(13)60222-6/abstract	Walker CLF, Rudan I, Liu L, Nair H, Theodoratou E, Bhutta ZA, et al. Global burden of childhood pneumonia and diarrhoea. The Lancet. 2013;381:1405–16.	download from original paper's online supplementary material
Child nutrition and infection	Non-exclusive breastfeeding	http://www.biomedcentral.com/1741-7015/11/254	Roberts TJ, Carnahan E, Gakidou E. Can breastfeeding promote child health equity? A comprehensive analysis of breastfeeding patterns across the developing world and what we can learn from them. BMC Med. 2013;11:254.	download from original paper's online supplementary material
Child nutrition and infection	Late HAART initiation for childhood HIV	http://www.unaids.org/sites/default/files/media_asset/UNAIDS_Global_Report_2013_en_1.pdf	Joint United Nations Programme on HIV/AIDS (UNAIDS). UNAIDS report on the global AIDS epidemic 2013 [Internet]. 2013 Nov. Available from: http://www.unaids.org/sites/default/files/media_asset/UNAIDS_Global_Report_2013_en_1.pdf	data are available in S1 Table
Child nutrition and infection	Childhood zinc deficiency	http://www.plosone.org/article/info%3Adoi%2F10.1371%2Fjournal.pone.0050568	Wessells KR, Brown KH. Estimating the Global Prevalence of Zinc Deficiency: Results Based on Zinc Availability in National Food Supplies and the Prevalence of Stunting. PLoS ONE. 2012;7:e50568.	download from original paper's online supplementary material
Environmental factors	Unimproved sanitation	http://www.ncbi.nlm.nih.gov/pubmed/23428550	Wolf J, Bonjour S, Prüss-Ustün A. An exploration of multilevel modeling for estimating access to drinking-water and sanitation. J Water Health 2013; 11: 64–77	data are available in S1 Table
Environmental factors	Unimproved water	http://www.ncbi.nlm.nih.gov/pubmed/23428550	Wolf J, Bonjour S, Prüss-Ustün A. An exploration of multilevel modeling for estimating access to drinking-water and sanitation. J Water Health 2013; 11: 64–77	data are available in S1 Table
Environmental factors	Use of biomass fuels	http://www.ncbi.nlm.nih.gov/pubmed/23674502	Bonjour S, Adair-Rohani H, Wolf J, Bruce NG, Mehta S, Prüss-Ustün A, et al. Solid fuel use for household cooking: country and regional estimates for 1980-2010. Environ. Health Perspect. 2013;121:784–90.	download from original paper's online supplementary material
Fetal growth restriction and preterm birth	Low birth weight	http://www.ncbi.nlm.nih.gov/pubmed/25103583	Lee AC, Katz J, Blencowe H, et al. National and regional estimates of term and preterm babies born small for gestational age in 138 low-income and middle-income countries in 2010. Lancet Glob Health 2013; 1: e26–36.	download from original paper's online supplementary material
Fetal growth restriction and preterm birth	Preterm, appropriate-for-gestational age	http://www.ncbi.nlm.nih.gov/pubmed/25103583	Lee AC, Katz J, Blencowe H, et al. National and regional estimates of term and preterm babies born small for gestational age in 138 low-income and middle-income countries in 2010. Lancet Glob Health 2013; 1: e26–36.	download from original paper's online supplementary material
Fetal growth restriction and preterm birth	Preterm, small-for-gestational age	http://www.ncbi.nlm.nih.gov/pubmed/25103583	Lee AC, Katz J, Blencowe H, et al. National and regional estimates of term and preterm babies born small for gestational age in 138 low-income and middle-income countries in 2010. Lancet Glob Health 2013; 1: e26–36.	download from original paper's online supplementary material
Fetal growth restriction and preterm birth	Term, small-for-gestational age	http://www.ncbi.nlm.nih.gov/pubmed/25103583	Lee AC, Katz J, Blencowe H, et al. National and regional estimates of term and preterm babies born small for gestational age in 138 low-income and middle-income countries in 2010. Lancet Glob Health 2013; 1: e26–36.	download from original paper's online supplementary material
Maternal nutrition and infection	Maternal anemia	http://www.thelancet.com/journals/langlo/article/PIIS2214-109X(13)70001-9/abstract	Stevens GA, Finucane MM, De-Regil LM, Paciorek CJ, Flaxman SR, Branca F, et al. Global, regional, and national trends in haemoglobin concentration and prevalence of total and severe anaemia in children and pregnant and non-pregnant women for 1995–2011: a systematic analysis of population-representative data. Lancet Glob. Health. 2013;1:e16–25.	data are available in S1 Table
Maternal nutrition and infection	Maternal underweight	http://www.thelancet.com/pdfs/journals/lancet/PIIS0140-6736(16)30054-X.pdf	NCDRF Collaboration. Trends in adult body-mass index in 200 countries from 1975 to 2014: a pooled analysis of 1698 population-based measurement studies with 19·2 million participants. The Lancet. 2016;387:1377–96.	data are available in S1 Table
Maternal nutrition and infection	Maternal malaria	http://www.map.ox.ac.uk/explorer/	Gething PW, Patil AP, Smith DL, Guerra CA, Elyazar IR, Johnston GL, et al. A new world malaria map: Plasmodium falciparum endemicity in 2010. Malar. J. 2011;10:378.	data are available in S1 Table
Maternal nutrition and infection	Maternal short stature	https://elifesciences.org/content/5/e13410	NCD Risk Factor Collaboration (NCDRF). A century of trends in adult human height. eLife. 2016;5:e13410.	SDs are available in S1 Table and means are available at http://www.ncdrisc.org/d-height.html
Teenage motherhood and short birth intervals	Teenage motherhood	http://dhsprogram.com/data/	Demographic and Health Surveys	data downloadable from online
Teenage motherhood and short birth intervals	Short birth intervals	http://dhsprogram.com/data/	Demographic and Health Surveys	data downloadable from online
Outcome	Childhood stunting	http://www.ncbi.nlm.nih.gov/pubmed/22770478	Stevens GA, Finucane MM, Paciorek CJ, Flaxman SR, White RA, Donner AJ, et al. Trends in mild, moderate, and severe stunting and underweight, and progress towards MDG 1 in 141 developing countries: a systematic analysis of population representative data. The Lancet. 2012;380:824–34.	download from online: https://www1.imperial.ac.uk/publichealth/departments/ebs/projects/eresh/majidezzati/healthmetrics/childmaternalundernutrition/
